# Supplementary material for: Accelerated materials design of Na0.5Bi0.5TiO3 oxygen ionic conductors based on first principles calculations
Source: Royal Society of Chemistry journal article supplement (doi:10.1039/c5cp02181b), 2015-01-01
Supplement: c5cp02181b1.pdf [file c5cp02181b1.pdf]

### Supporting information

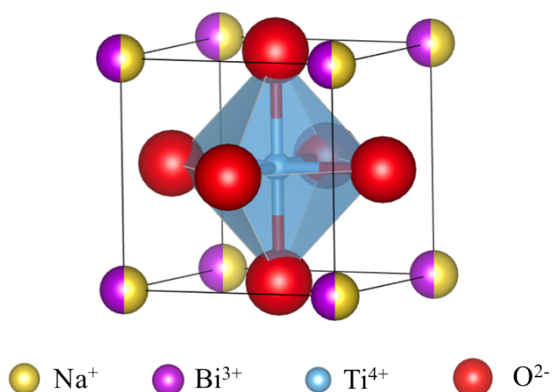

**Figure S1.** Crystal structure of  $\text{Na}_{0.5}\text{Bi}_{0.5}\text{Ti}_3\text{O}_3$ . Na and Bi ions share the A sites and Ti ions occupy the B sites. The octahedral of  $\text{TiO}_6$  is shown for clarity.

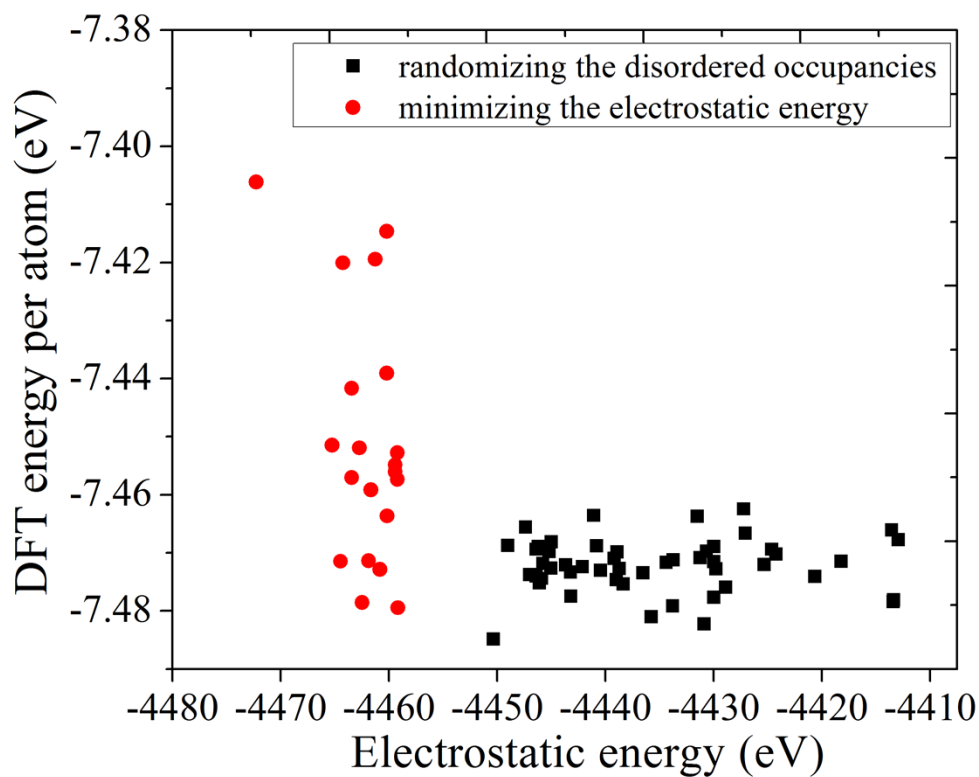

**Figure S2.** Electrostatic energy versus DFT energy for the  $\text{Na}_{0.5}\text{Bi}_{0.5}\text{Ti}_3\text{O}_3$  with different A-site configurations, which were generated by randomizing the disordered occupancies (black) and by minimizing the electrostatic energy (red) of A-site Na and Bi sublattice.

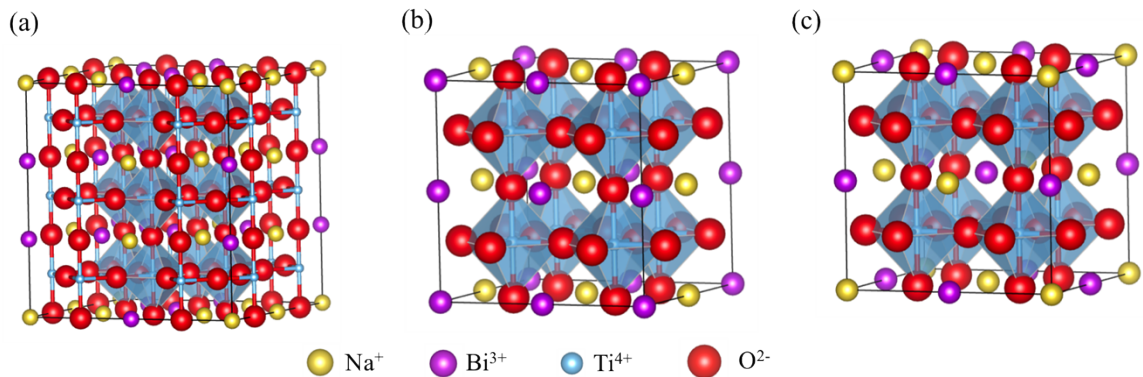

**Figure S3.** Crystal structures of  $\text{Na}_{0.5}\text{Bi}_{0.5}\text{Ti}_3\text{O}_3$  with different A-site Na/Bi sublattice, which has (a) the lowest DFT energy, (b) the  $\{001\}$  layered ordering, or (c) the rock-salt ordering. The octahedral of  $\text{TiO}_6$  is shown for clarity. The DFT energies for these three structures are: (a)  $-7.485$  eV/atom, (b)  $-7.437$  eV/atom, (c)  $-7.397$  eV/atom, respectively.
